# Supplementary material for: Sex hormone-binding globulin regulation of androgen bioactivity in vivo: validation of the free hormone hypothesis
Source: PubMed Central journal article supplement (PMC5066276; doi:10.1038/srep35539), 2016-10-17
Supplement: srep35539-s1.pdf [file srep35539-s1.pdf]

# **Sex hormone-binding globulin regulation of androgen bioactivity in vivo: validation of the free hormone hypothesis**

Michaël R. Laurent,<sup>1,2</sup> Geoffrey L. Hammond,<sup>3</sup> Marco Blokland,<sup>4</sup> Ferran Jardí,<sup>5</sup> Leen Antonio,<sup>5</sup> Vanessa Dubois,<sup>1,6</sup> Rougin Khalil,<sup>5</sup> Saskia S. Sterk,<sup>4</sup> Evelien Gielen,<sup>2</sup> Brigitte Decallonne,<sup>5</sup> Geert Carmeliet,<sup>5</sup> Jean-Marc Kaufman,<sup>7</sup> Tom Fiers,<sup>7</sup> Ilpo T. Huhtaniemi,<sup>8</sup> Dirk Vanderschueren,<sup>5</sup> and Frank Claessens<sup>1\*</sup>

<sup>1</sup> Laboratory of Molecular Endocrinology, Department of Cellular and Molecular Medicine, KU Leuven, Herestraat 49 PO box 901, 3000 Leuven, Belgium

<sup>2</sup> Gerontology and Geriatrics, Department of Clinical and Experimental Medicine, KU Leuven, Herestraat 49 PO box 7003, Leuven, Belgium

<sup>3</sup> Department of Cellular and Physiological Sciences, University of British Columbia, 2350 Health Sciences Mall, V6T 1Z3 Vancouver, B.C., Canada

<sup>4</sup> RIKILT, European Union Reference Laboratory for Residues, Wageningen UR, Akkermaalsbos 2, 6708WB Wageningen, The Netherlands

<sup>5</sup> Clinical and Experimental Endocrinology, Department of Clinical and Experimental Medicine, KU Leuven, Herestraat 49 PO box 902, 3000 Leuven, Belgium

<sup>6</sup> INSERM UMR1011, University of Lille and Institut Pasteur de Lille, Lille, France

<sup>7</sup> Laboratory for Hormonology and Department of Endocrinology, Ghent University Hospital, De Pintelaan 185, 9000 Ghent, Belgium

<sup>8</sup> Institute of Reproductive and Developmental Biology, Department of Surgery and Cancer, Imperial College London, Hammersmith Campus, Du Cane Rd, London, W12 0NN, United Kingdom

## **Supplementary information**

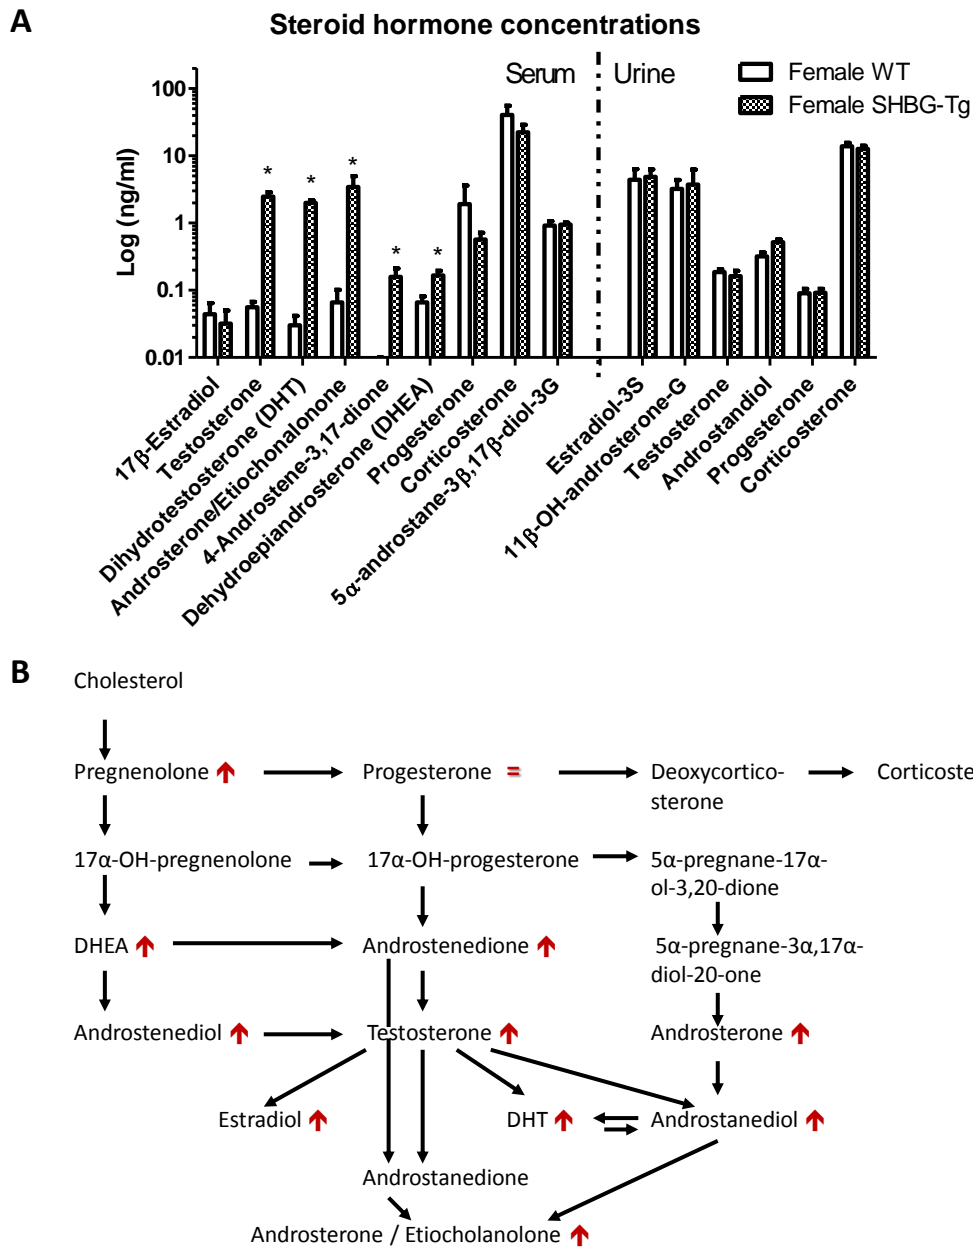

**Fig. S1. Steroid hormone profile in SHBG-Tg mice.**

A. Concentrations in serum (left from vertical dotted line) and urine (right from vertical dotted line) of selected steroid hormones in randomly cycling 24-week-old WT and SHBG-Tg female mice (n=5 per group). \* = P<0.05 vs. WT mice.

B. Simplified diagram showing the metabolism of selected steroid hormones (assessed by our steroid profile LC-MS/MS method) along with summary of differences (shown in red) in SHBG-Tg vs. WT mice.

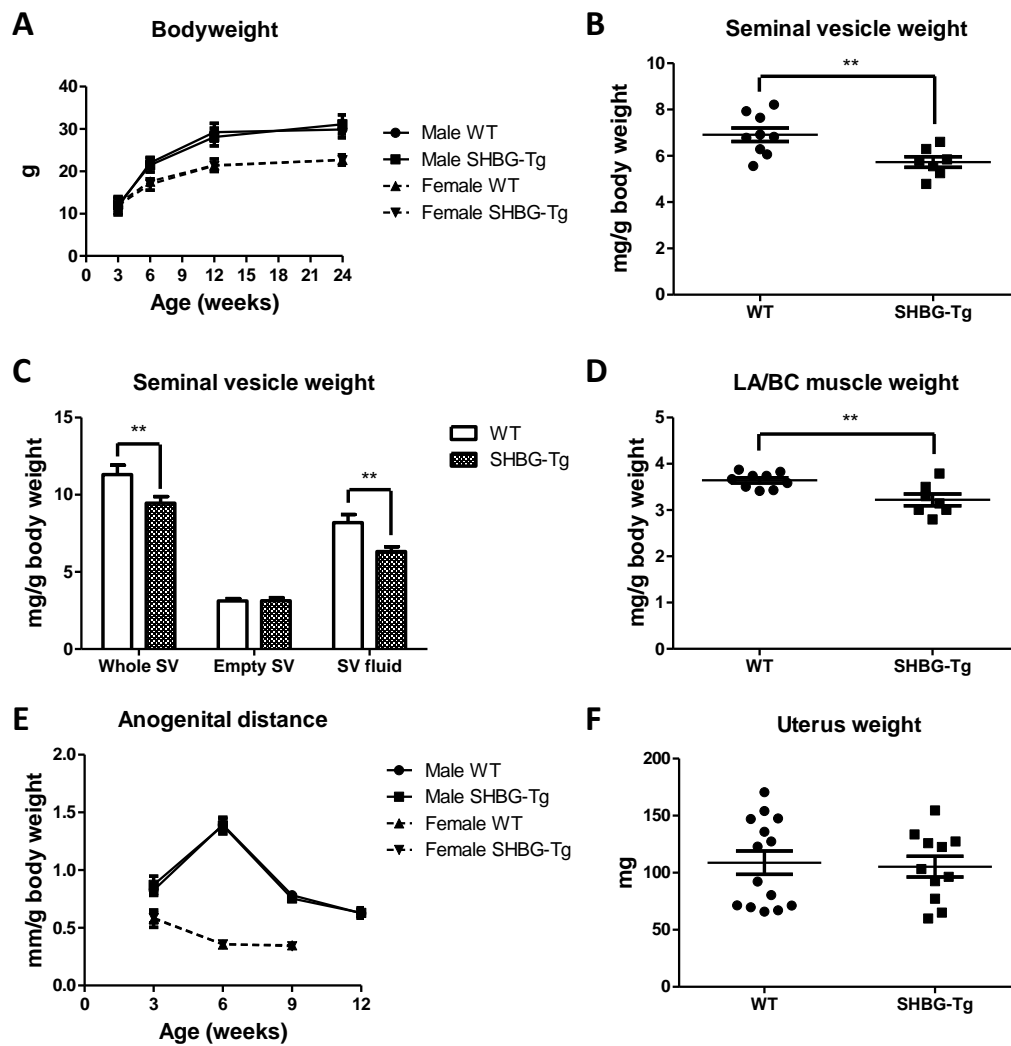

**Fig. S2. Additional phenotyping of SHBG-Tg mice.**

- A. Body mass evolution in both genders and genotypes at different ages. n=8-17 per group
- B. Seminal vesicle (SV) weights at 9 weeks of age. n=7-10 per group. \*\* =  $P < 0.01$
- C. Weights of intact SVs, fluid-emptied organs and SV fluid. n=4-6 per group. \*\* =  $P < 0.01$  by Bonferroni's post-test after two-way ANOVA showing significant effect of fluid expression ( $P < 0.0001$ ), genotype ( $P = 0.03$ ) and interaction ( $P = 0.001$ ).
- D. Levator ani/bulbocavernosus complex (LA/BC) muscle weights at 9 weeks of age. n=7-10 per group. \*\* =  $P < 0.01$
- E. Anogenital distance evolution in both genders and genotypes at different ages across puberty. Note consistently higher levels in males, and decrease in males from age 6 weeks due to faster body weight gains than anogenital separation. Mean  $\pm$  SD shown, n=5-13 per group and timepoint.
- F. Uterus weights of WT and SHBG-Tg mice at 24 weeks of age. n=11-14 per group.

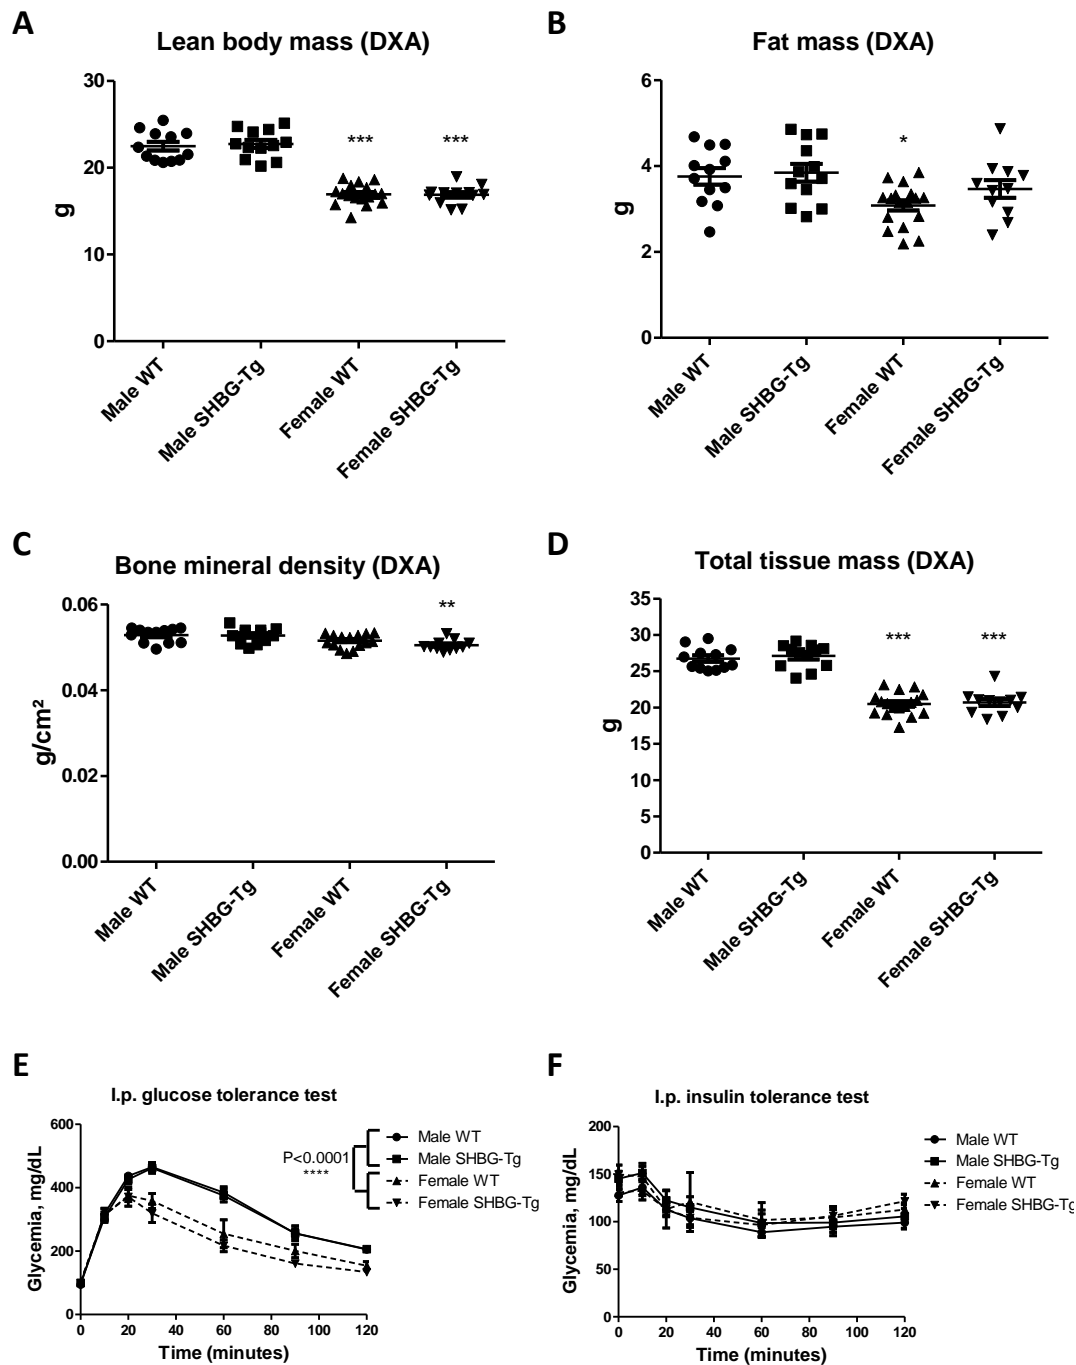

**Fig. S3. Normal body composition and glucose homeostasis in SHBG-Tg mice.**

A-D. Lean body mass, fat mass, bone mineral density and total tissue mass by *in vivo* dual-energy X-ray absorptiometry (DXA) in 24-week-old male and female WT and SHBG-Tg mice. n=11-17 per group. \* = P<0.05, \*\* = P<0.01, \*\*\* = P<0.001 compared to WT males.

E, F. Glycemic responses to an i.p. glucose or insulin tolerance test. n=7-8 (males) and n=4-6 (females) for each genotype.

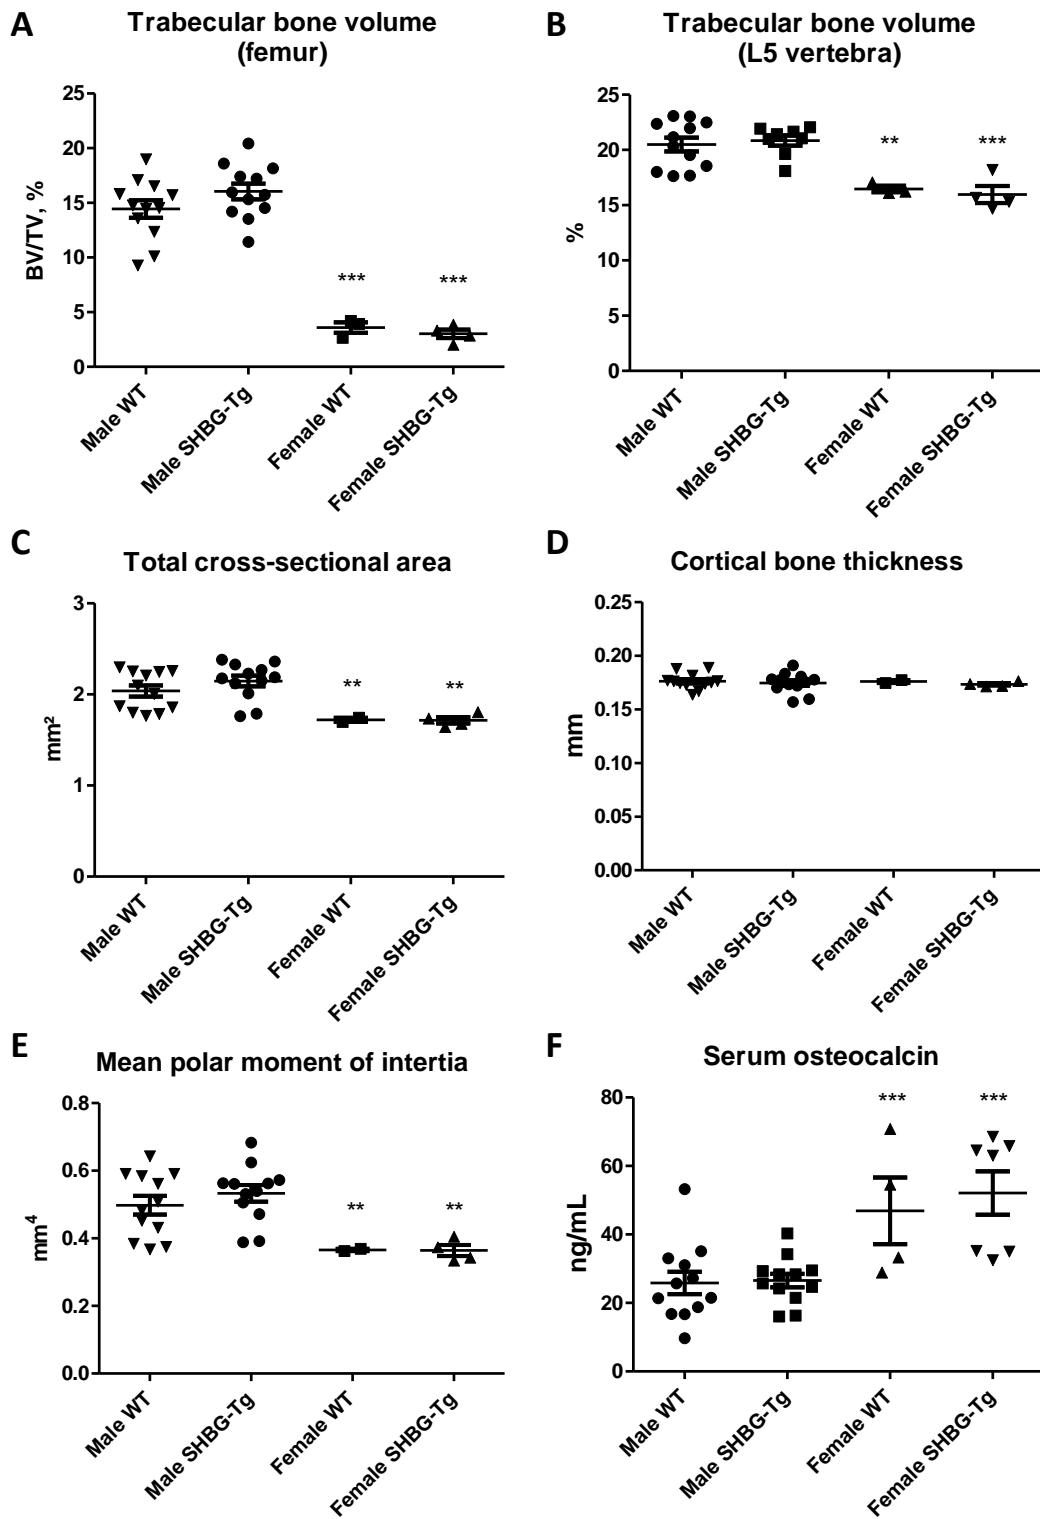

**Fig. S4. Lack of bone phenotype in 24-week-old SHBG-Tg mice.**

A. Trabecular bone volume (BV/TV) in the distal femur. n=12 (males) and n=3-4 (females) for each genotype. \*\*\* = P<0.001 compared to WT males.

B. Trabecular bone volume (BV/TV) in the L5 vertebra. n=8-12 (males) and n=3-4 (females) for each genotype. \*\* = P<0.01, \*\*\* = P<0.001 compared to WT males.

- C. Total cross-sectional bone area (an indicator of periosteal circumference) of the femoral midshaft. n=12 (males) and n=3-4 (females) for each genotype. \*\* =  $P < 0.01$  compared to WT males.
- D. Cortical bone thickness of the femoral midshaft. n=12 (males) and n=3-4 (females) for each genotype.
- E. Mean polar moment of inertia of the femoral midshaft. n=12 (males) and n=3-4 (females) for each genotype. \*\* =  $P < 0.01$  compared to WT males.
- F. Serum osteocalcin. n=12 (males) and n=4-7 (females) for each genotype.
